# Supplementary material for: Autophagy regulates testosterone synthesis by facilitating cholesterol uptake in Leydig cells
Source: PubMed Central journal article supplement — J Cell Biol. 2018 Jun 4;217(6):2103–19. doi: 10.1083/jcb.201710078 (PMC5987723; doi:10.1083/jcb.201710078), 2018-06-04
Supplement: JCB_201710078_sm.pdf [file JCB_201710078_sm.pdf]

Supplemental material

Gao et al., <https://doi.org/10.1083/jcb.201710078>

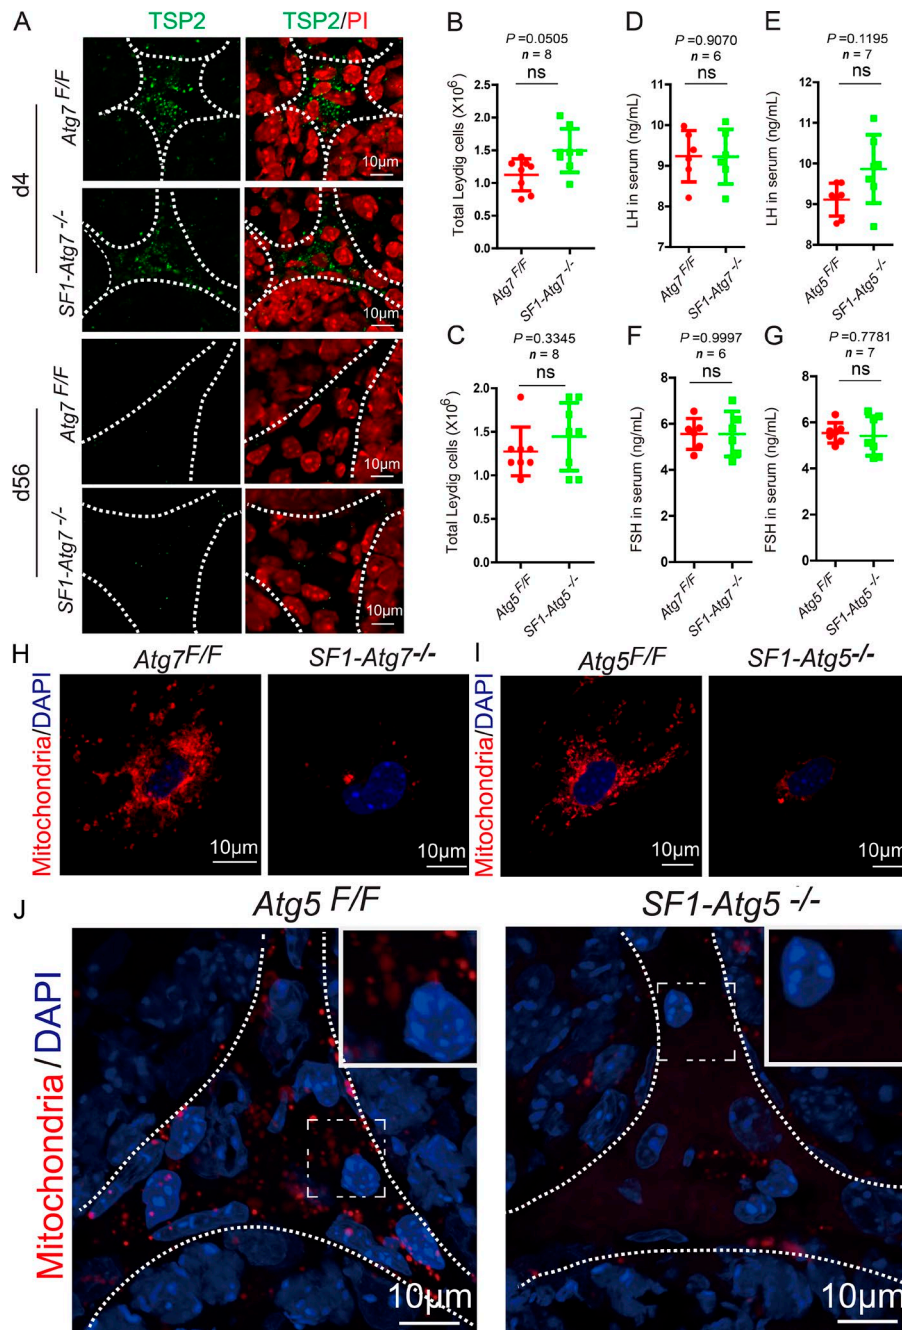

Figure S1. **The disruption of autophagy does not affect the fetal–adult Leydig cell transition, proliferation, and Gn secretion, but it influences the number of mitochondria.** Related to Fig. 3. **(A)** Immunofluorescence staining of TSP2 (green) in *Atg7*<sup>Flox/Flox</sup> and *SF1-Atg7*<sup>-/-</sup> mouse testes at d4 and d56. Nuclei were stained with PI (red). **(B and C)** The total number of Leydig cells was not reduced in *SF1-Atg5*<sup>-/-</sup> and *SF1-Atg7*<sup>-/-</sup> mice. **(B)** *Atg7*<sup>Flox/Flox</sup> (red,  $1.13 \pm 0.09 \times 10^6$  per testis) and *SF1-Atg7*<sup>-/-</sup> (green,  $1.50 \pm 0.12 \times 10^6$  per testis). **(C)** *Atg5*<sup>Flox/Flox</sup> (red,  $1.28 \pm 0.10 \times 10^6$  per testis) and *SF1-Atg5*<sup>-/-</sup> (green,  $1.44 \pm 0.14 \times 10^6$  per testis). **(D and E)** The serum concentration of LH was not significantly changed in autophagy-deficient mice. **(D)** *Atg7*<sup>Flox/Flox</sup> mice (red,  $9.24 \pm 0.26$  ng/ml) and *SF1-Atg7*<sup>-/-</sup> mice (green,  $9.23 \pm 0.28$  ng/ml). **(E)** *Atg5*<sup>Flox/Flox</sup> mice (red,  $9.11 \pm 0.15$  ng/ml) and *SF1-Atg5*<sup>-/-</sup> mice (green,  $9.86 \pm 0.32$  ng/ml). **(F and G)** The serum concentration of FSH was not significantly changed in autophagy-deficient mice. **(F)** *Atg7*<sup>Flox/Flox</sup> mice (red,  $5.69 \pm 0.27$  ng/ml) and *SF1-Atg7*<sup>-/-</sup> mice (green,  $5.56 \pm 0.40$  ng/ml). **(G)** *Atg5*<sup>Flox/Flox</sup> mice (red,  $5.54 \pm 0.17$  ng/ml) and *SF1-Atg5*<sup>-/-</sup> mice (green,  $5.41 \pm 0.32$  ng/ml). **(H and I)** The mitochondria of isolated autophagy-deficient Leydig cells and control groups were labeled with MitoTracker red and observed using fluorescence microscopy. **(J)** DsRed-labeled mitochondria (red) were directly detected in *Atg5*<sup>Flox/Flox</sup>; *CAG/su9-DsRed2* mice and *SF1-Atg5*<sup>-/-</sup>; *CAG/su9-DsRed2* mice. Insets are marked by boxes and are 15 μm wide. Nuclei were labeled with DAPI (blue).

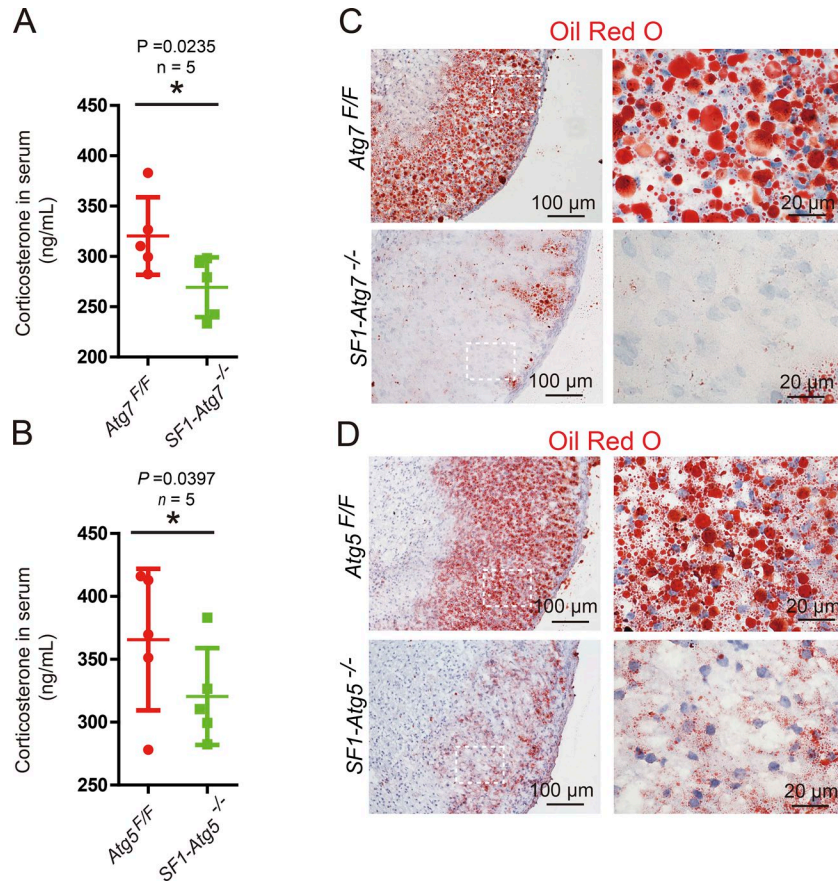

Figure S2. **The lipids in the adrenal cortex and corticosterone in the serum decrease in the steroidogenic cell-specific autophagy disruption mice.** **(A and B)** The serum concentration of corticosterone was decreased in autophagy-deficient mice. **(A)** *Atg7<sup>Flox/Flox</sup>* mice (red,  $320.4 \pm 17.23$  ng/ml) and *SF1-Atg7<sup>-/-</sup>* mice (green,  $269.4 \pm 13.28$  ng/ml). **(B)** *Atg5<sup>Flox/Flox</sup>* mice (red,  $345.6 \pm 31.50$  ng/ml) and *SF1-Atg5<sup>-/-</sup>* mice (green,  $261.5 \pm 27.56$  ng/ml). \*,  $P < 0.05$ . **(C and D)** LDs dramatically decreased in the adrenal cortex of the steroidogenic cell-specific autophagy disruption mice. **(C)** ORO (red) staining in *Atg7<sup>Flox/Flox</sup>* (top) and *SF1-Atg7<sup>-/-</sup>* (bottom) adrenal cortex frozen sections. **(D)** ORO (red) staining in *Atg5<sup>Flox/Flox</sup>* (top) and *SF1-Atg5<sup>-/-</sup>* (bottom) adrenal cortex frozen sections. Insets are marked by boxes.

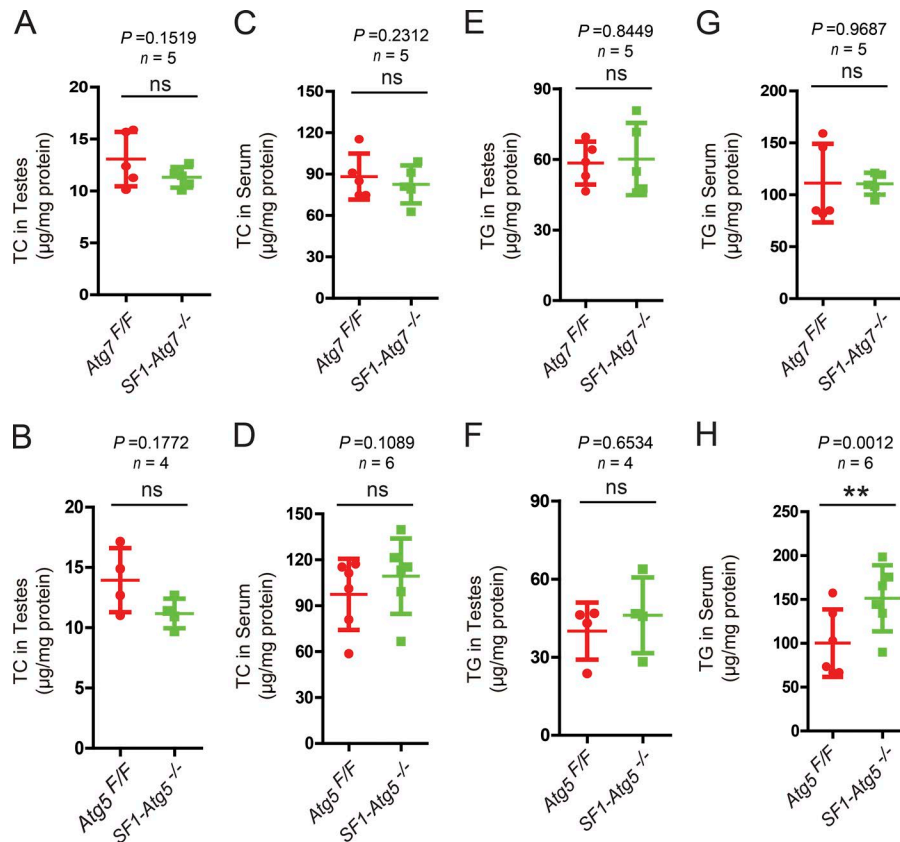

Figure S3. **The steroidogenic cell-specific disruption of autophagy does not affect the concentrations of TGs and TC in testes and serum.** Related to Fig. 3. **(A and B)** The concentrations of TC in autophagy-deficient mouse testes were not reduced compared with control groups. **(A)** *Atg7<sup>Flox/Flox</sup>* mice (red, 12.42 ± 1.12 µg/mg protein) and *SF1-Atg7<sup>-/-</sup>* mice (green, 11.29 ± 0.51 µg/mg protein). **(B)** *Atg5<sup>Flox/Flox</sup>* mice (red, 13.95 ± 1.33 µg/mg protein) and *SF1-Atg5<sup>-/-</sup>* mice (green, 11.18 ± 0.61 µg/mg protein). **(C and D)** The concentrations of TC in autophagy-deficient mice serum were not changed compared with the control groups. **(C)** *Atg7<sup>Flox/Flox</sup>* mice (red, 91.55 ± 7.70 µg/mg protein) and *SF1-Atg7<sup>-/-</sup>* mice (black column, 82.94 ± 7.09 µg/mg protein). **(D)** *Atg5<sup>Flox/Flox</sup>* mice (red, 97.45 ± 10.58 µg/mg protein) and *SF1-Atg5<sup>-/-</sup>* mice (green, 109.27 ± 11.01 µg/mg protein). **(E and F)** The concentrations of TGs in autophagy-deficient mouse testes were similar to those in the control groups. **(E)** *Atg7<sup>Flox/Flox</sup>* mice (red, 56.99 ± 4.38 µg/mg protein) and *SF1-Atg7<sup>-/-</sup>* mice (green, 54.98 ± 5.24 µg/mg protein). **(F)** *Atg5<sup>Flox/Flox</sup>* mice (red, 39.99 ± 5.47 µg/mg protein) and *SF1-Atg5<sup>-/-</sup>* mice (green, 46.10 ± 7.26 µg/mg protein). **(G and H)** The concentrations of TGs in autophagy-deficient mouse serum were not reduced compared with the control groups. **(G)** *Atg7<sup>Flox/Flox</sup>* mice (red, 117.51 ± 18.02 µg/mg protein) and *SF1-Atg7<sup>-/-</sup>* mice (green, 114.56 ± 3.01 µg/mg protein). **(H)** *Atg5<sup>Flox/Flox</sup>* mice (red, 100.29 ± 12.04 µg/mg protein) and *SF1-Atg5<sup>-/-</sup>* mice (green, 151.32 ± 13.63 µg/mg protein). \*\*, P < 0.01.

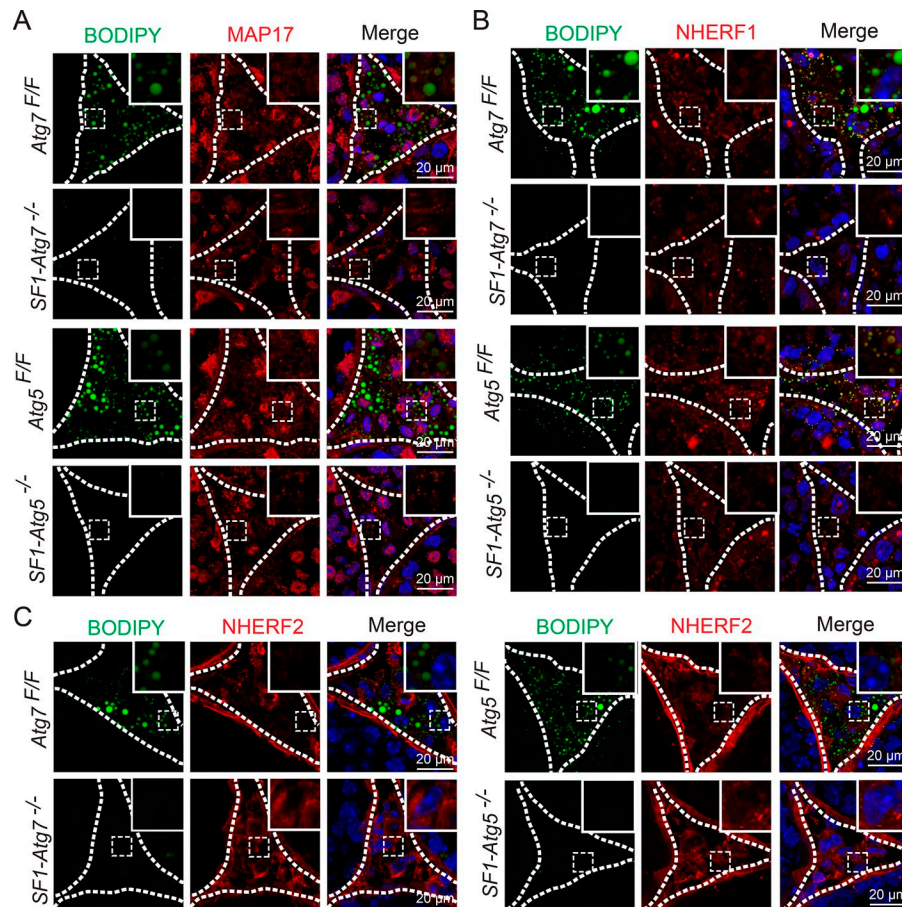

Figure S4. **Only NHERF2 is accumulated in autophagy-deficient Leydig cells.** Related to Fig. 5. **(A)** Immunofluorescence staining of MAP17 (red) and BODIPY staining (green) in autophagy-deficient mouse testes and control groups. **(B)** Immunofluorescence staining of NHERF1 (red) and BODIPY staining (green) in autophagy-deficient mouse testes and control groups. **(C)** Immunofluorescence staining of NHERF2 (red) and BODIPY staining (green) in autophagy-deficient mouse testes and control groups. Nuclei were stained with DAPI (blue). Insets are marked by boxes and are 10 μM wide.



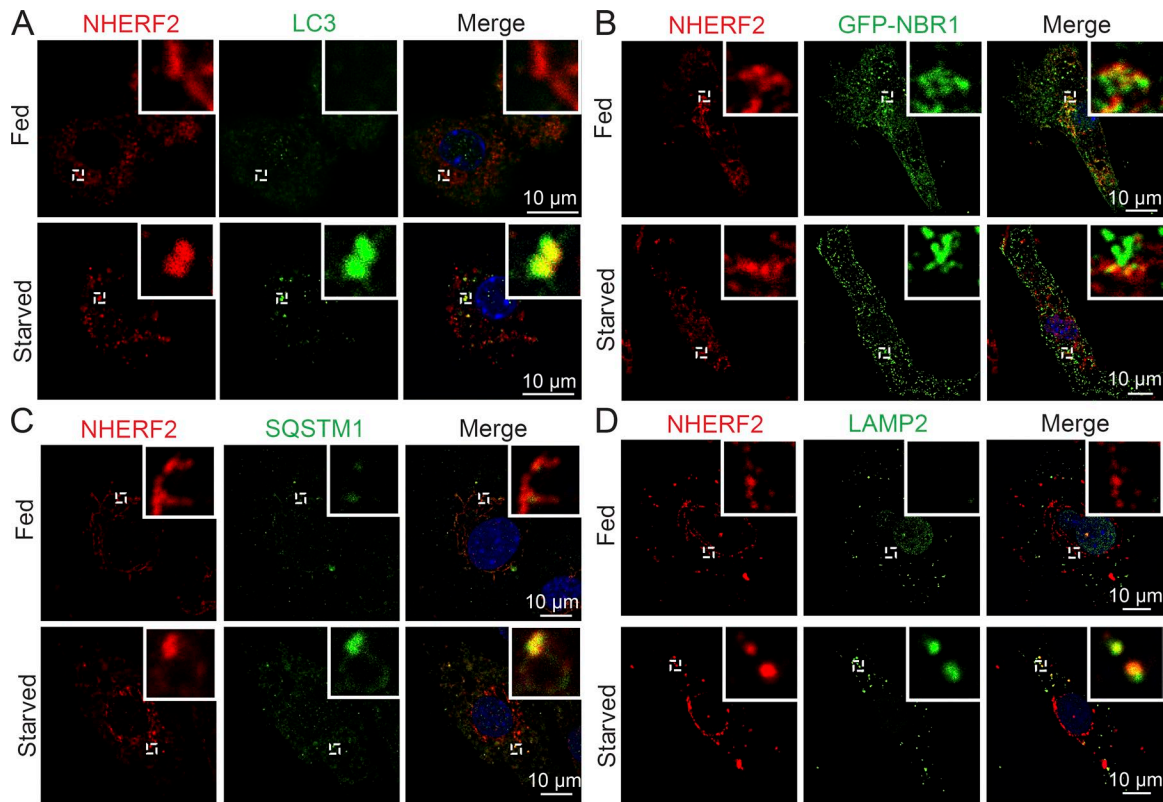

Figure S5. **NHERF2 partially colocalizes with LC3, NBR1, SQSTM1, and LAMP2 in starved Leydig cells.** Related to Fig. 5. **(A)** Immunofluorescence analysis of NHERF2 (red) and LC3 (green) in fed and starved Leydig cells. **(B)** Immunofluorescence analysis of NHERF2 (red) and NBR1 (green) in fed and starved Leydig cells. **(C)** Immunofluorescence analysis of NHERF2 (red) and SQSTM1 (green) in fed and starved Leydig cells. **(D)** Immunofluorescence analysis of NHERF2 (red) and LAMP2 (green) in fed and starved Leydig cells. Nuclei were stained with DAPI (blue). Insets are marked by boxes and are 2.3  $\mu\text{M}$  (A) or 2.8  $\mu\text{M}$  (B–D) wide.

Table S1. **Characteristics of human patients in the normal serum testosterone level study**

| Medical record no. | Age<br><i>yr</i> | Testosterone level<br><i>ng/ml</i> | Clinical diagnosis                  | Relative LC3 intensity | LC3 puncta numbers | Relative NHERF2 intensity | Relative SR-BI intensity |
|--------------------|------------------|------------------------------------|-------------------------------------|------------------------|--------------------|---------------------------|--------------------------|
| 14-01671           | 29               | 4.66                               | Azoospermia, varicocele             | 11609.6                | 193                | 13328.80322               | 19754.55277              |
| 14-03119           | 33               | 4.22                               | Azoospermia, varicocele             | 11613.3                | 345                | 7791.443628               | 13478.35806              |
| 14-00366           | 22               | 3.6                                | Oligospermia                        | 20941.4                | 565                | 14613.92317               | 25473.66523              |
| 15-0375            | 39               | 5.86                               | Azoospermia, bilateral vas ligation | 17618.1                | 503                | 5292.289558               | 18960.77936              |
| 15-0822            | 24               | 5.23                               | Azoospermia, varicocele             | 12687.3                | 258                | 8866.248787               | 12547.83248              |
| 14-02870           | 25               | 4.83                               | Obstructive azoospermia             | 6362.15                | 404                | 3390.952711               | 6247.871168              |
| 15-0609            | 36               | 5.16                               | Azoospermia, redundant prepuce      | 6931.48                | 274                | 6444.235196               | 16471.26612              |
| 13-00024           | 35               | 4.95                               | Obstructive azoospermia             | 12846.8                | 224                | 6287.177923               | 8750.533907              |
| 13-00766           | 30               | 9.28                               | Azoospermia                         | 14762.9                | 377                | 9610.275967               | 15822.30204              |
| 13-02023           | 25               | 8.65                               | Obstructive azoospermia             | 7428.2                 | 290                | 14154.23104               | 16899.10137              |
| 13-04042           | 39               | 8.24                               | Azoospermia                         | 9278.64                | 393                | 7790.09014                | 12280.15254              |
| 13-01038           | 24               | 8.51                               | Azoospermia                         | 26997.3                | 345                | 13929.16378               | 8917.463576              |

Table S2. **Characteristics of human patients in the low-serum testosterone level study**

| Medical record no. | Age<br><i>yr</i> | Testosterone level<br><i>ng/ml</i> | Clinical diagnosis                                         | Relative LC3 intensity | LC3 puncta numbers | Relative NHERF2 intensity | Relative SR-BI intensity |
|--------------------|------------------|------------------------------------|------------------------------------------------------------|------------------------|--------------------|---------------------------|--------------------------|
| 13-04219           | 30               | 2.23                               | Azoospermia, Syndrome de Klinefelter                       | 9213.743               | 148                | 7329.233116               | 18429.15762              |
| 13-04318           | 33               | 2.53                               | Azoospermia, varicocele                                    | 8090.767               | 480                | 10645.91041               | 10427.57981              |
| 14-03056           | 23               | 1.83                               | Azoospermia, varicocele                                    | 5339.931               | 267                | 6261.456109               | 8077.143815              |
| 14-04072           | 22               | 2.98                               | Azoospermia, varicocele                                    | 6535.413               | 348                | 9649.846069               | 14360.84123              |
| 14-04586           | 23               | 2.03                               | Azoospermia, varicocele                                    | 21604.6                | 380                | 7247.250035               | 9360.477541              |
| 14-04810           | 35               | 2.83                               | Azoospermia, varicocele                                    | 7774.267               | 171                | 4442.429621               | 7062.881463              |
| 14-5014            | 30               | 1.02                               | Azoospermia, varicocele                                    | 9390.367               | 221                | 7783.239495               | 8627.456741              |
| 15-1030            | 27               | 2.76                               | Azoospermia                                                | 10771.94               | 207                | 16436.69117               | 13241.79725              |
| 15-1062            | 30               | 2.97                               | Azoospermia                                                | 12039.47               | 165                | 16203.42532               | 18358.20742              |
| 15-4484            | 24               | 2.7                                | Azoospermia, varicocele                                    | 7886.856               | 263                | 4182.662599               | 9823.974483              |
| 15-5117            | 25               | 1.05                               | Azoospermia                                                | 9075.124               | 332                | 3207.438635               | 6871.272486              |
| 13-01037           | 27               | 2.87                               | Azoospermia                                                | 10082.77               | 157                | 30832.90528               | 9401.55781               |
| 13-01248           | 27               | 2.39                               | Azoospermia, varicocele                                    | 9692.442               | 202                | 4702.462904               | 11041.75586              |
| 13-03512           | 33               | 1.9                                | Azoospermia, varicocele                                    | 11858.4                | 160                | 18615.64554               | 15382.11758              |
| 15-5118            | 24               | 2.54                               | Azoospermia                                                | 13997.03               | 374                | 5448.697823               | 10035.51038              |
| 15-5120            | 25               | 2.26                               | Azoospermia, varicocele                                    | 9084.047               | 360                | 4447.607821               | 8107.178843              |
| 16-1748            | 28               | 2.78                               | Azoospermia                                                | 8994.569               | 79                 | 8273.113299               | 9587.513348              |
| 16-1750            | 30               | 2.24                               | Azoospermia, varicocele                                    | 9828.537               | 306                | 5134.353072               | 11075.36678              |
| 14-00256           | 33               | 2.88                               | Oligospermia, seminal vesiculitis, seminal vesicular stone | 8493.194               | 165                | 7307.822771               | 8248.74636               |
| 16-1350            | 25               | 2.68                               | Oligospermia, seminal vesiculitis                          | 11997.56               | 182                | 7230.115102               | 10222.96491              |
